# Supplementary material for: Perfusion fixation in brain banking: a systematic review
Source: Springer Nature journal article supplement (doi:10.1186/s40478-019-0799-y), 2019-09-05
Supplement: MOESM2 [file 25666918]

## Embase (Ovid)

Embase Classic+Embase 1947 to 2019 February 25

1556 results

1. exp central nervous system/
2. (brain\* or cerebrum or encephalon).tw,kw.
3. (central adj4 nervous adj4 system\*).tw,kw.
4. CNS.tw,kw.
5. or/1-4
6. organ perfusion/ or artery perfusion/ or brain perfusion/
7. perfusion/
8. perfusion\*.tw,kw.
9. or/6-8
10. tissue fixation/
11. (fixation or preservation).tw,kw.
12. or/10-11
13. 5 and 9 and 12

## Medline (Ovid)

Ovid MEDLINE(R) and Epub Ahead of Print, In-Process & Other Non-Indexed Citations, Daily and Versions(R) 1946 to February 25, 2019

1071 results

1. exp Central Nervous System/
2. (brain\* or cerebrum or encephalon).tw,kw,kf.
3. (central adj4 nervous adj4 system\*).tw,kw,kf.
4. CNS.tw,kw,kf.
5. or/1-4
6. exp Perfusion/
7. perfusion\*.tw,kw,kf.
8. or/6-7
9. exp Tissue Preservation/
10. (fixation or preservation).tw,kw,kf.
11. or/9-10
12. 5 and 8 and 11

## PubMed

1062 results as of 2/26/19

("Central Nervous System"[Mesh] OR (brain[tiab] OR brains[tiab] OR cerebrum[tiab] OR encephalon[tiab]) OR (central[tiab] AND nervous[tiab] system[tiab]) OR CNS[tiab]) AND ( "Perfusion"[Mesh] OR (perfusion\*[tiab])) AND ( "Tissue Preservation"[Mesh] OR (fixation[tiab] OR preservation[tiab]))

## Scopus

1543 results as of 2/25/19

Copy and paste:

```
( TITLE-ABS-KEY ( brain* OR cerebrum OR encephalon ) OR TITLE-ABS-KEY ( central  
W/3 nervous W/3 system* ) OR TITLE-ABS-KEY ( cns ) ) AND ( TITLE-ABS-KEY (   
perfusion* ) ) AND ( TITLE-ABS-KEY ( fixation OR preservation ) )
```
